# Supplementary material for: Human interictal epileptiform discharges are bidirectional traveling waves echoing ictal discharges
Source: eLife journal article supplement (doi:10.7554/elife.73541), 2022-01-20
Supplement: supp [file elife-73541-supp-v1.zip]

**A** observed directions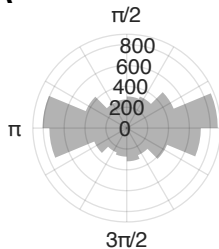

generate directions  
from circular  
normal fit

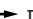**B** generated directions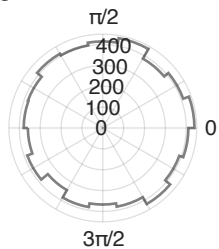

cluster into  
mixture of von Mises  
distributions

**C** clustered directions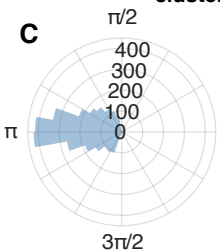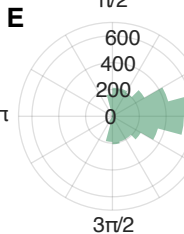

generate directions  
from the circular  
normal fit from  
each cluster

**D** generated directions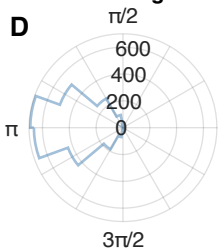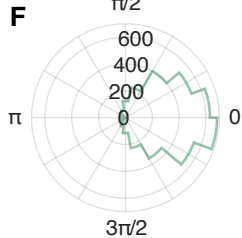

calculate Kuiper test statistic  
between observed and generated  
distributions 60 directions at a time, 1000 times

**G**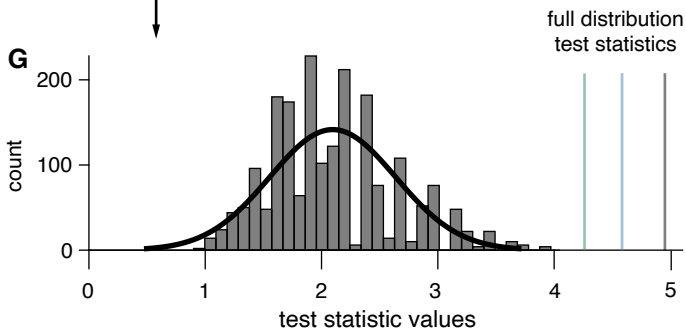**H**

Define bimodality index as the  
minimum difference between the  
Kuiper test statistic for the overall  
distribution and the von Mises  
Mixture distributions.

calculate Kuiper test statistic  
between observed and generated  
distributions 60 directions at a time, 1000 times
