# Supplementary material for: Human interictal epileptiform discharges are bidirectional traveling waves echoing ictal discharges
Source: eLife journal article supplement (doi:10.7554/elife.73541), 2022-01-20
Supplement: supp [file elife-73541-supp-v1.zip]

**A****ictal**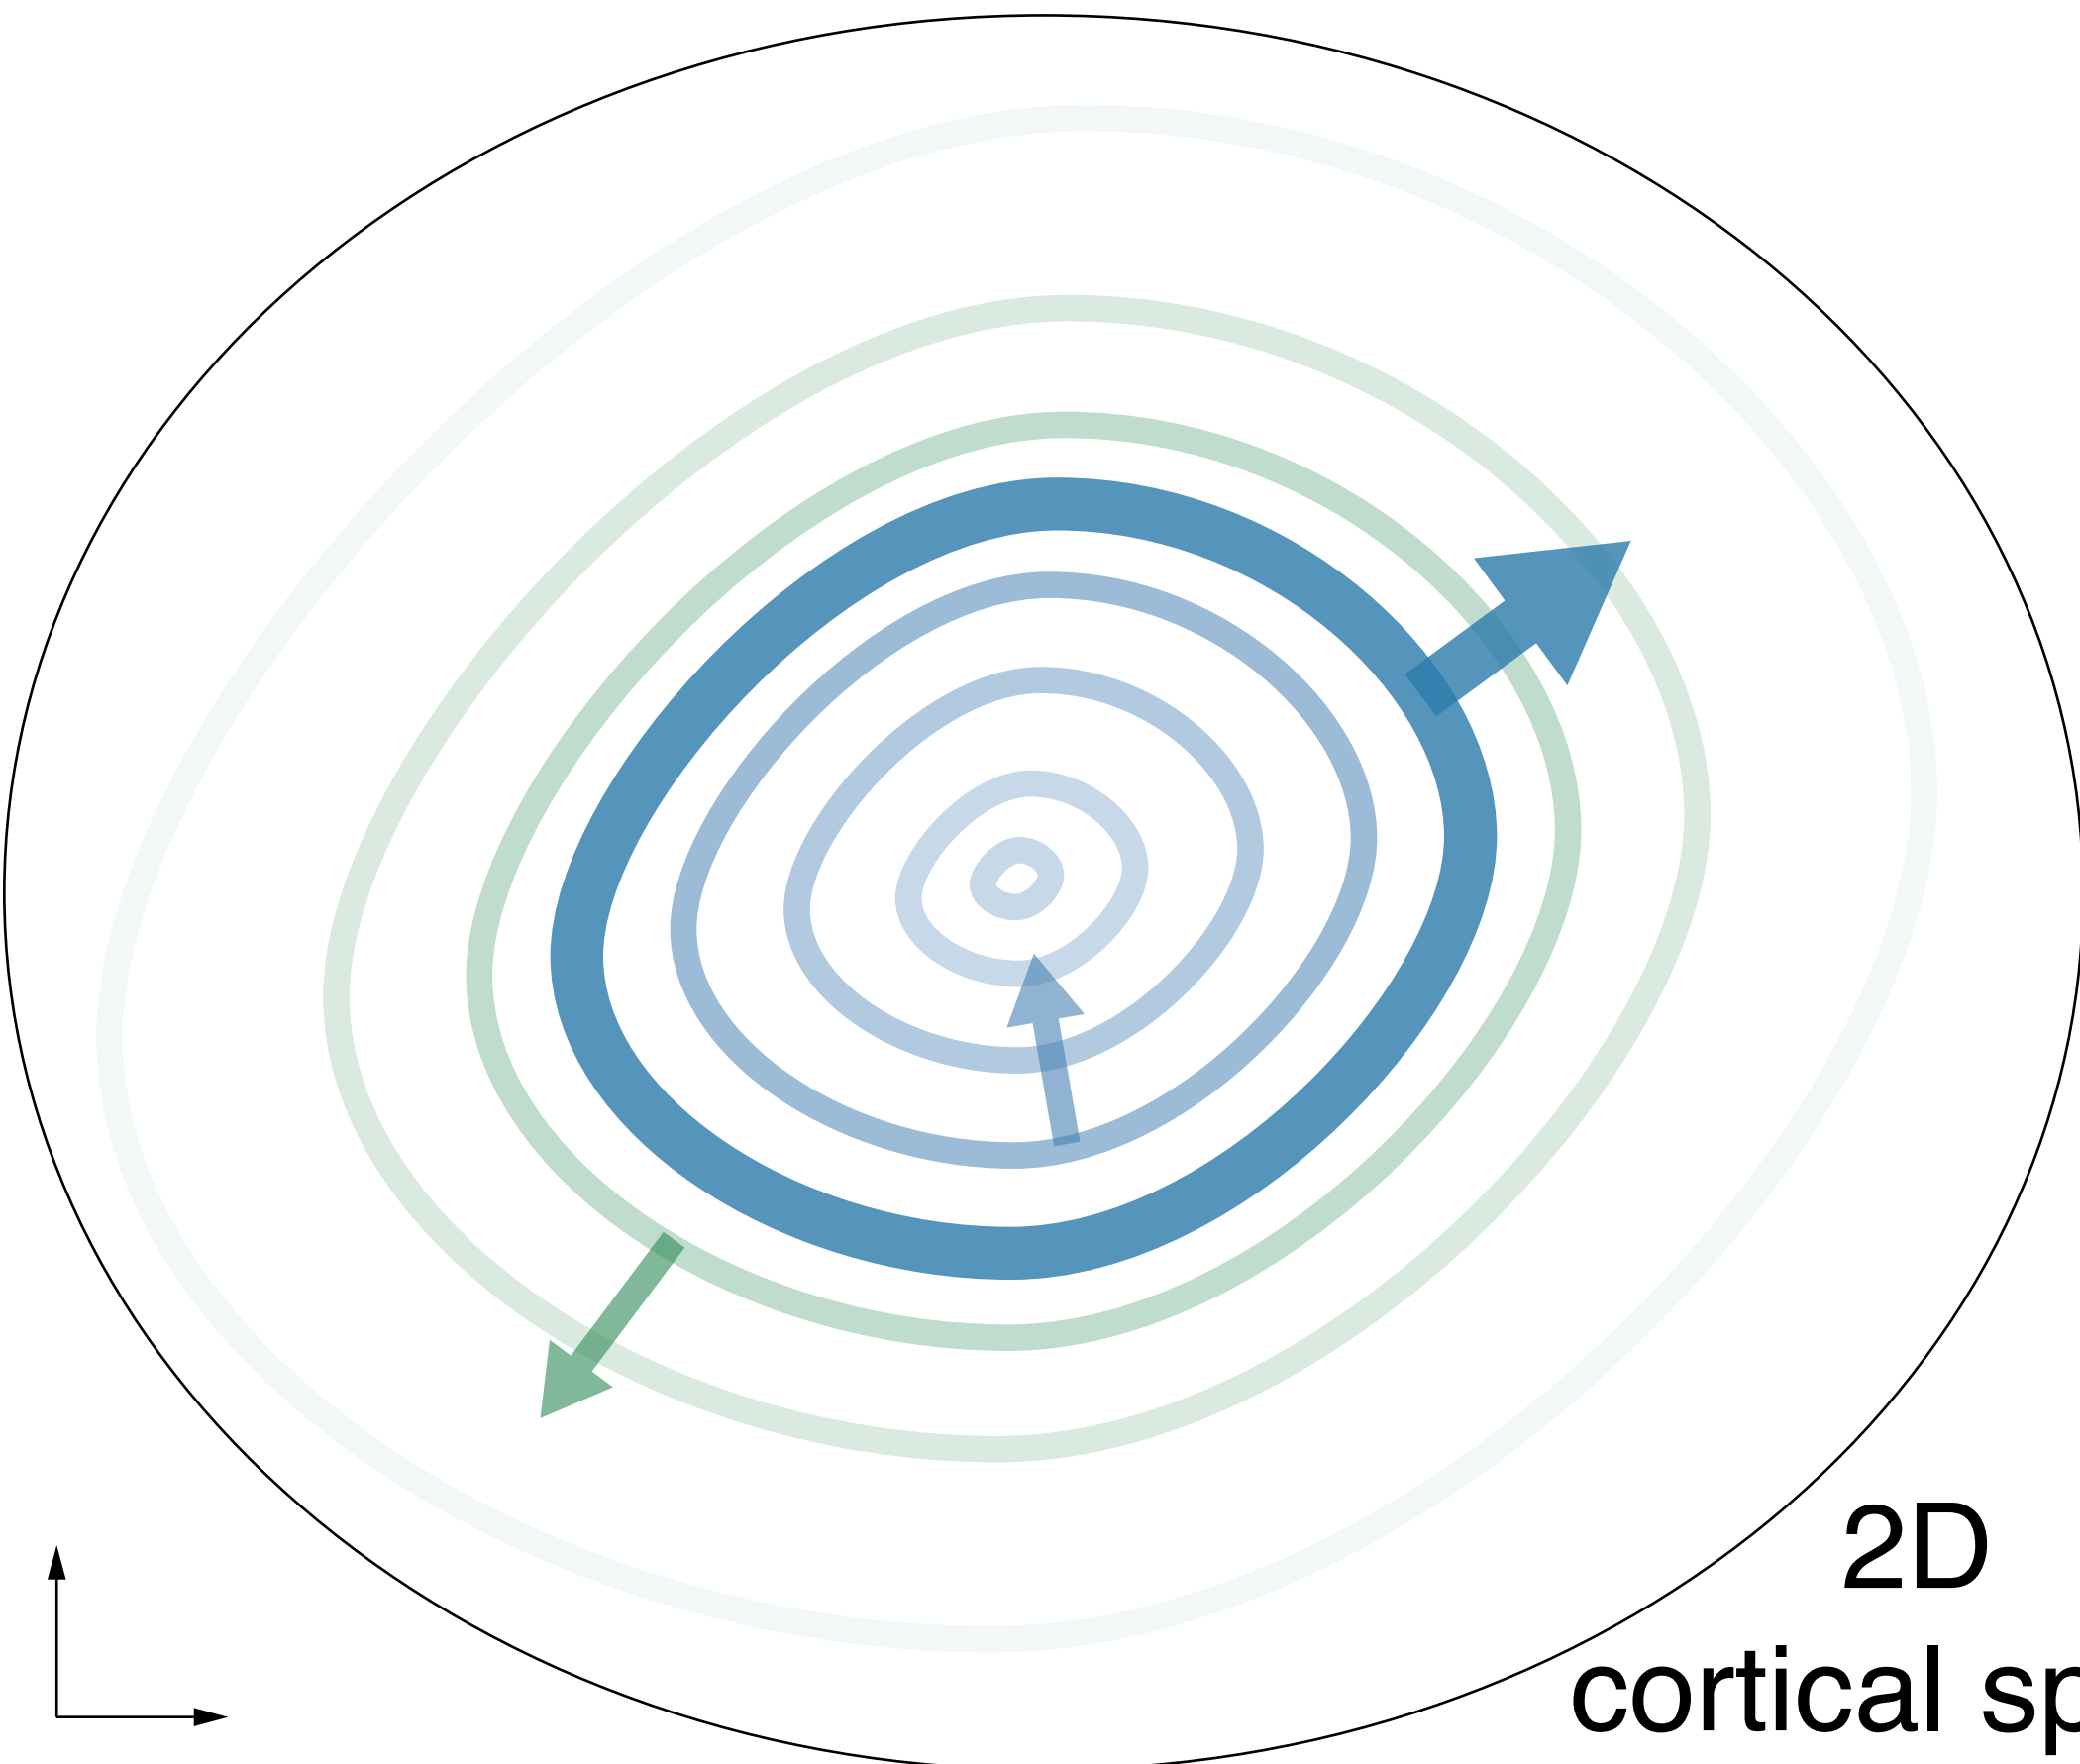**B****interictal**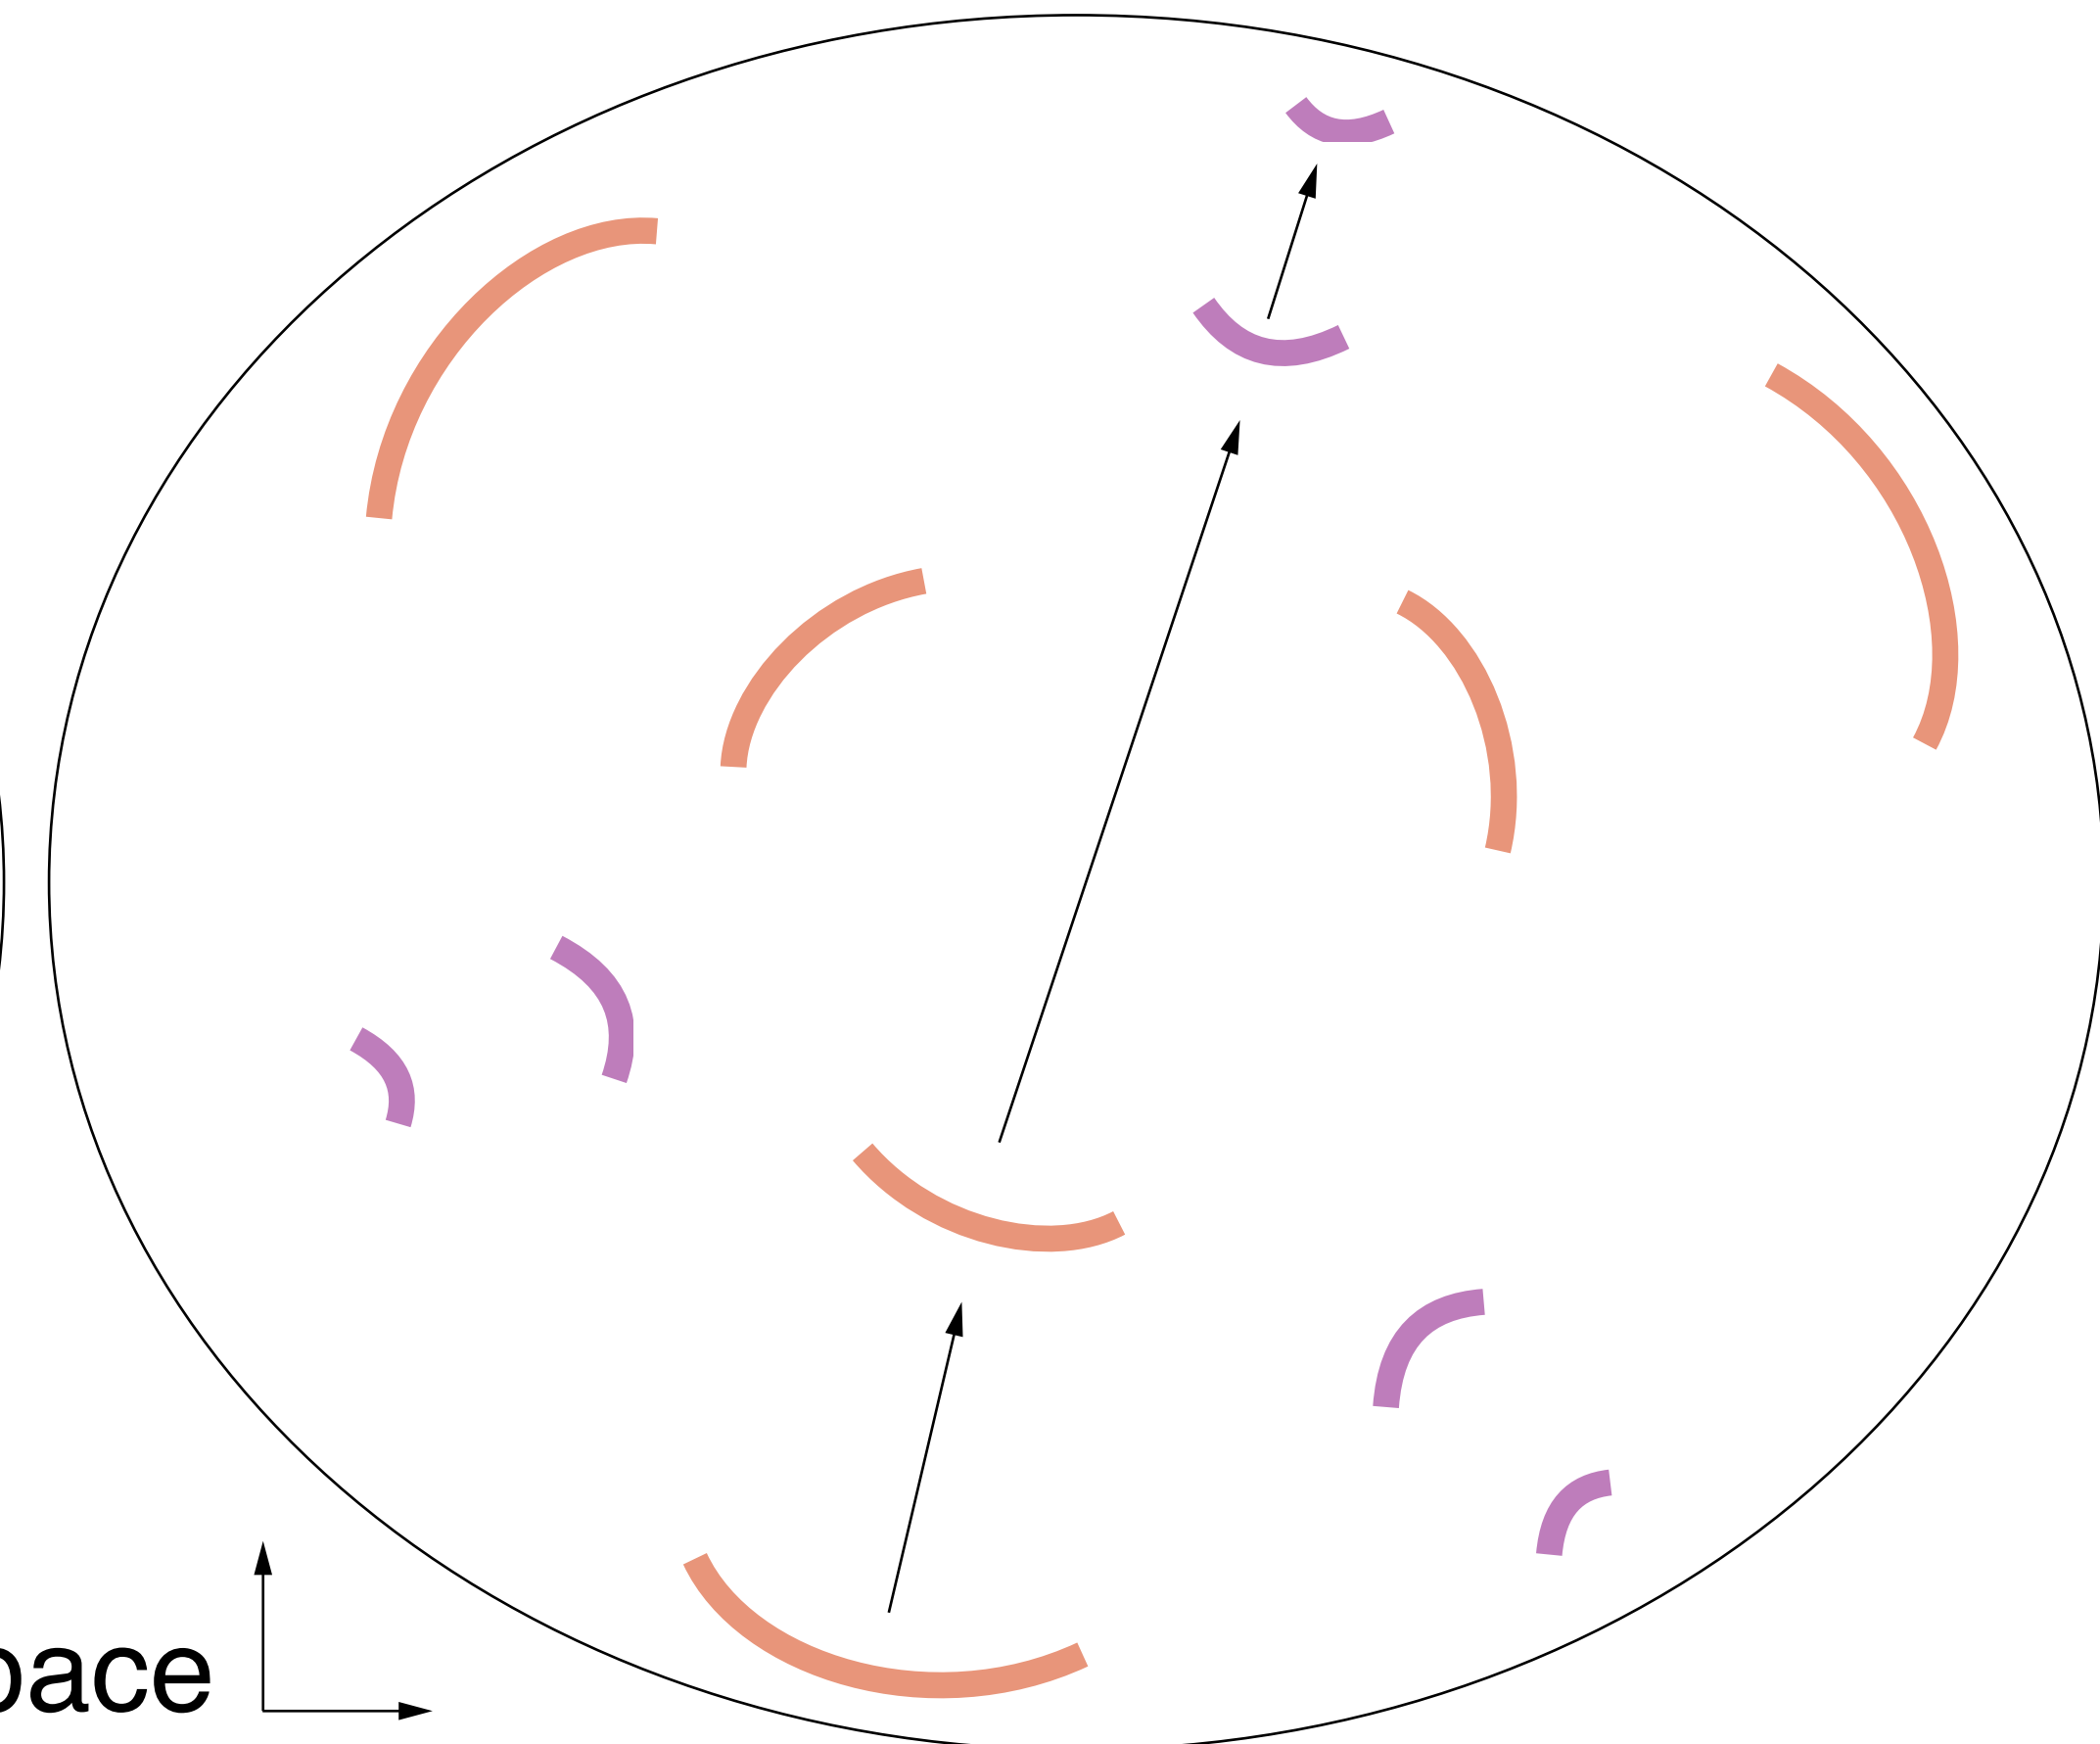

pre-recruitment discharges (penumbra)  
post-recruitment discharges (core)  
ictal wavefront (slowly expanding edge of seizure)

auxiliary IED sub-distribution  
predominant IED sub-distribution
