# Supplementary figures and images for: Human interictal epileptiform discharges are bidirectional traveling waves echoing ictal discharges
Source: eLife journal article supplement (doi:10.7554/elife.73541), 2022-01-20

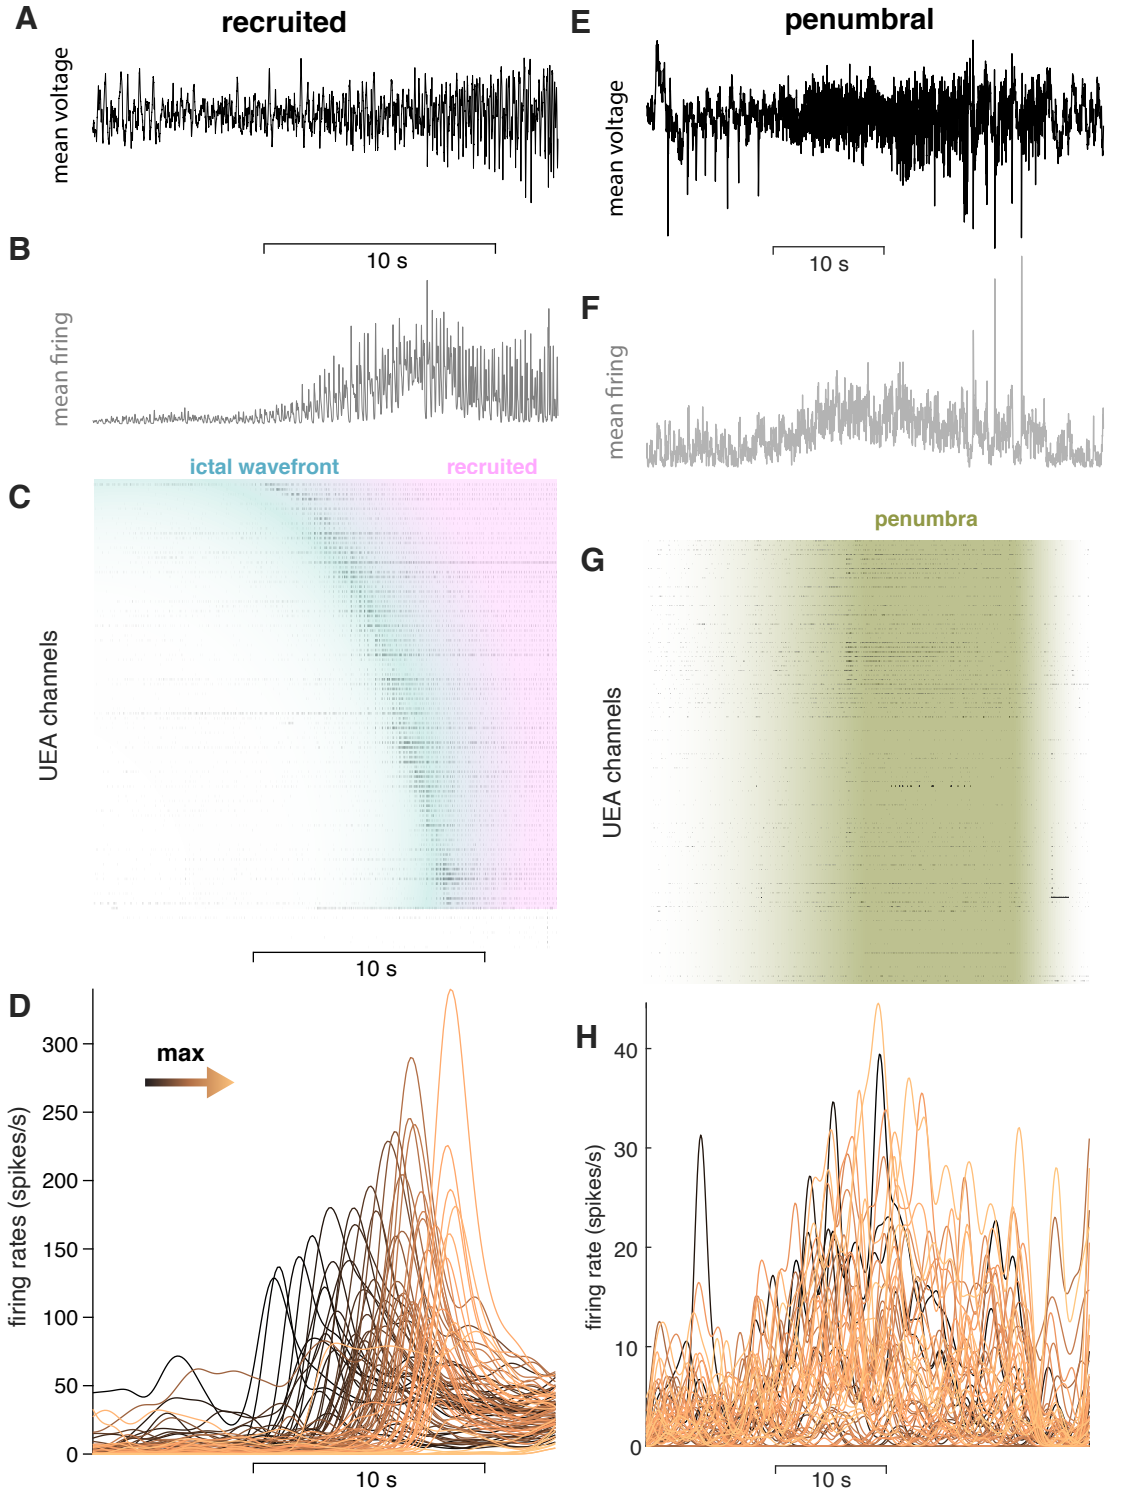

Supplement: supp [file elife-73541-supp-v1.zip]

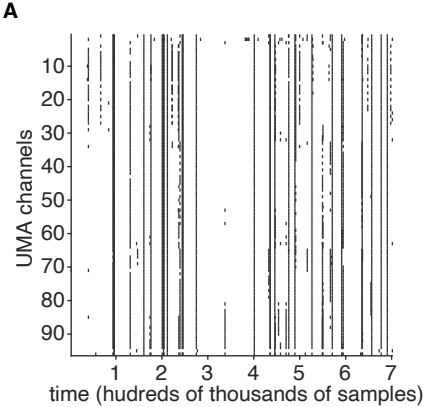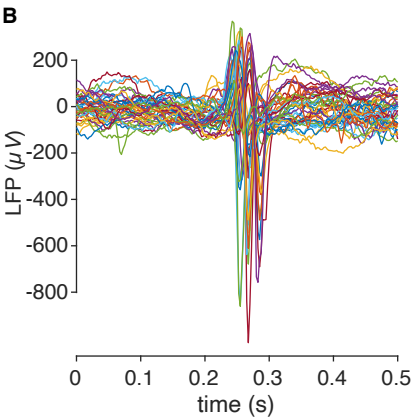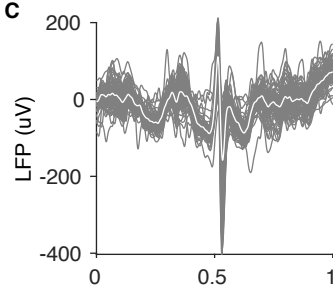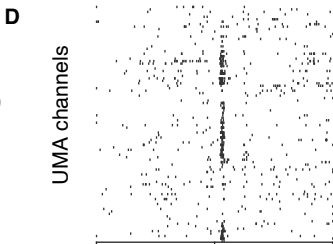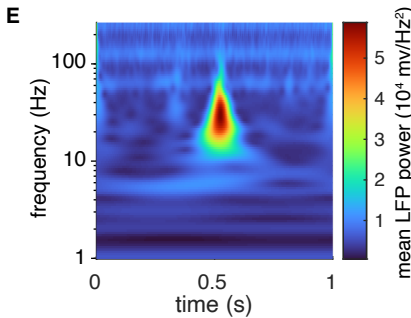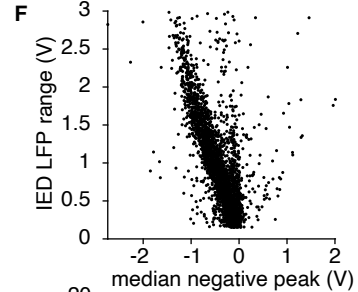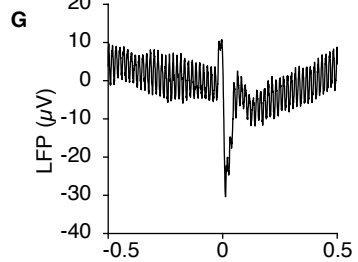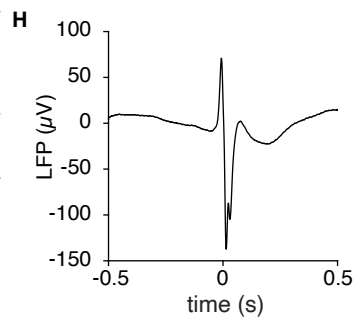

Supplement: supp [file elife-73541-supp-v1.zip]

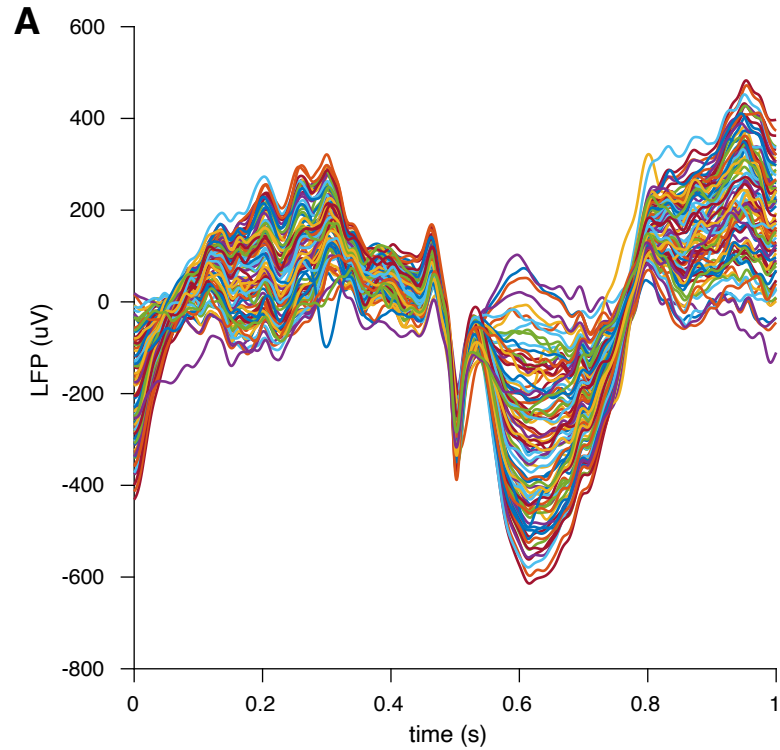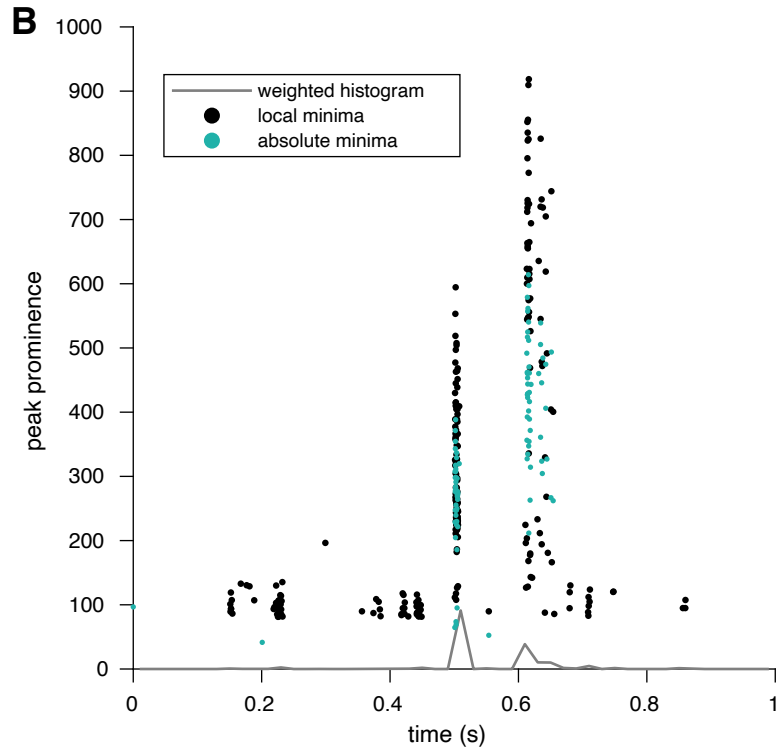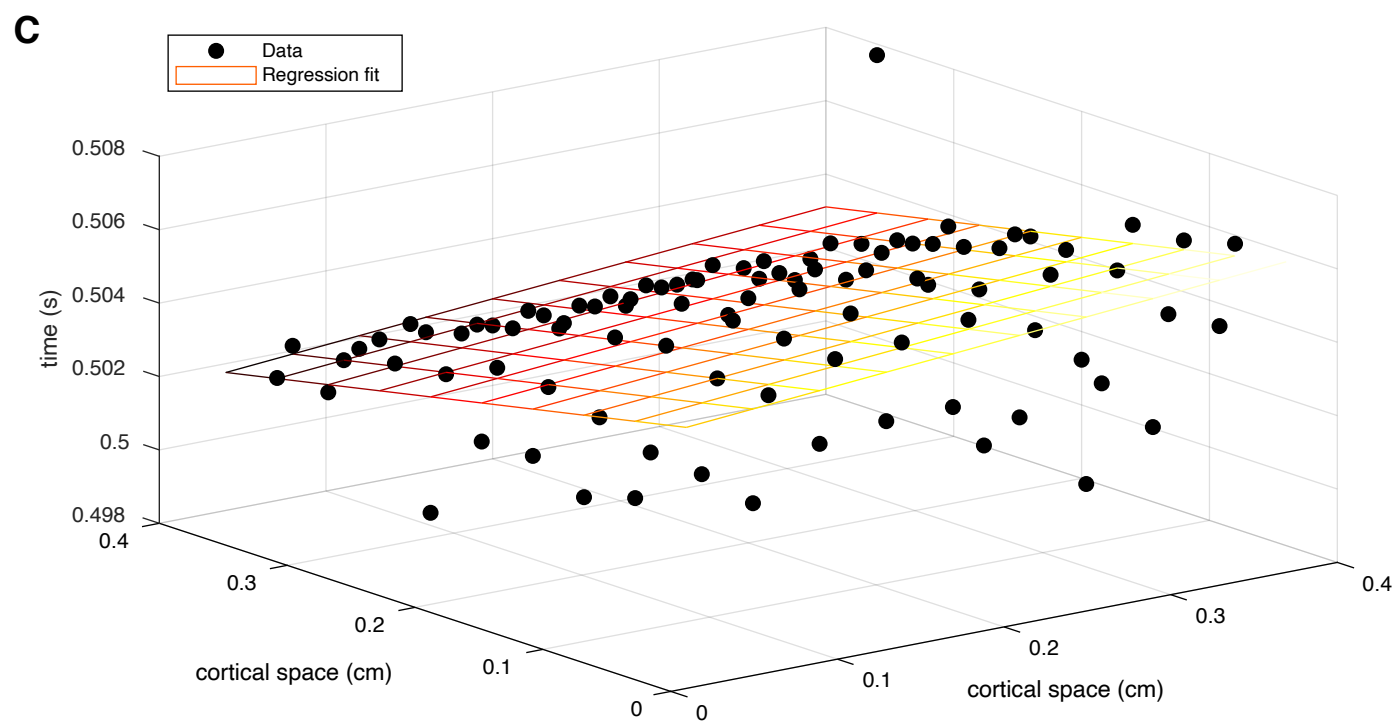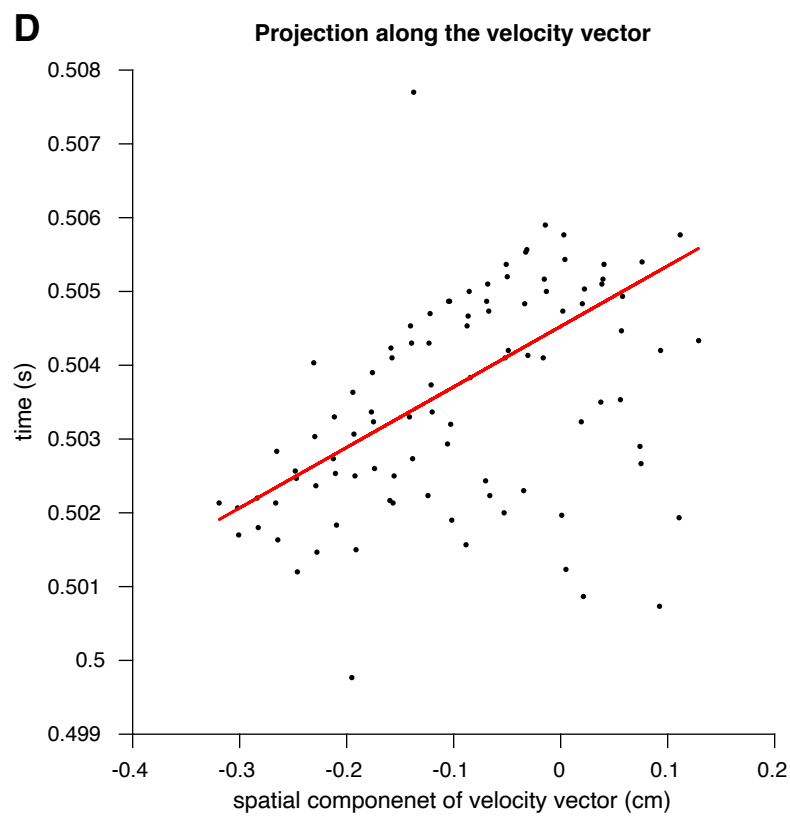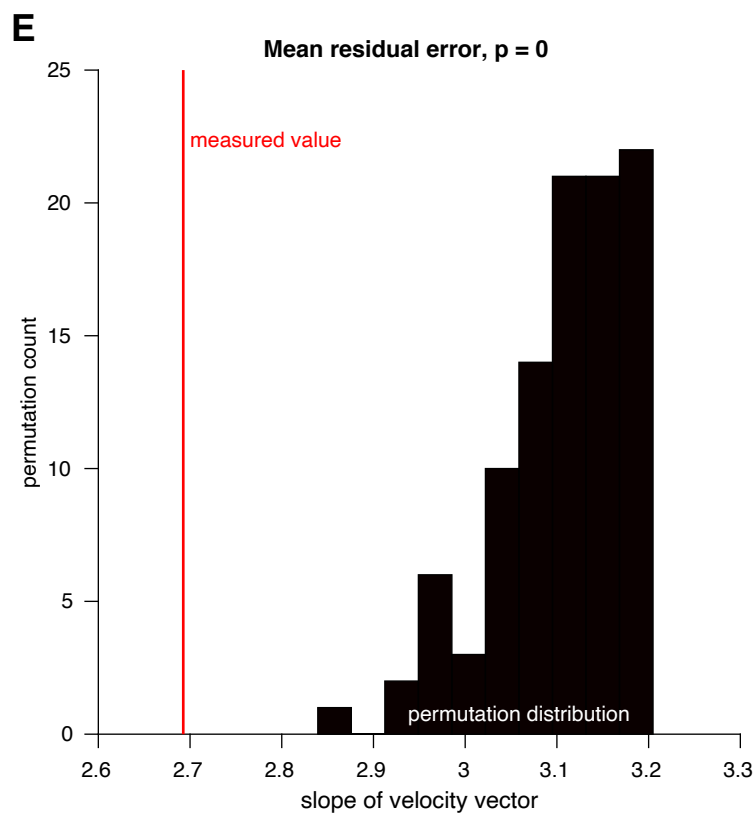

Supplement: supp [file elife-73541-supp-v1.zip]

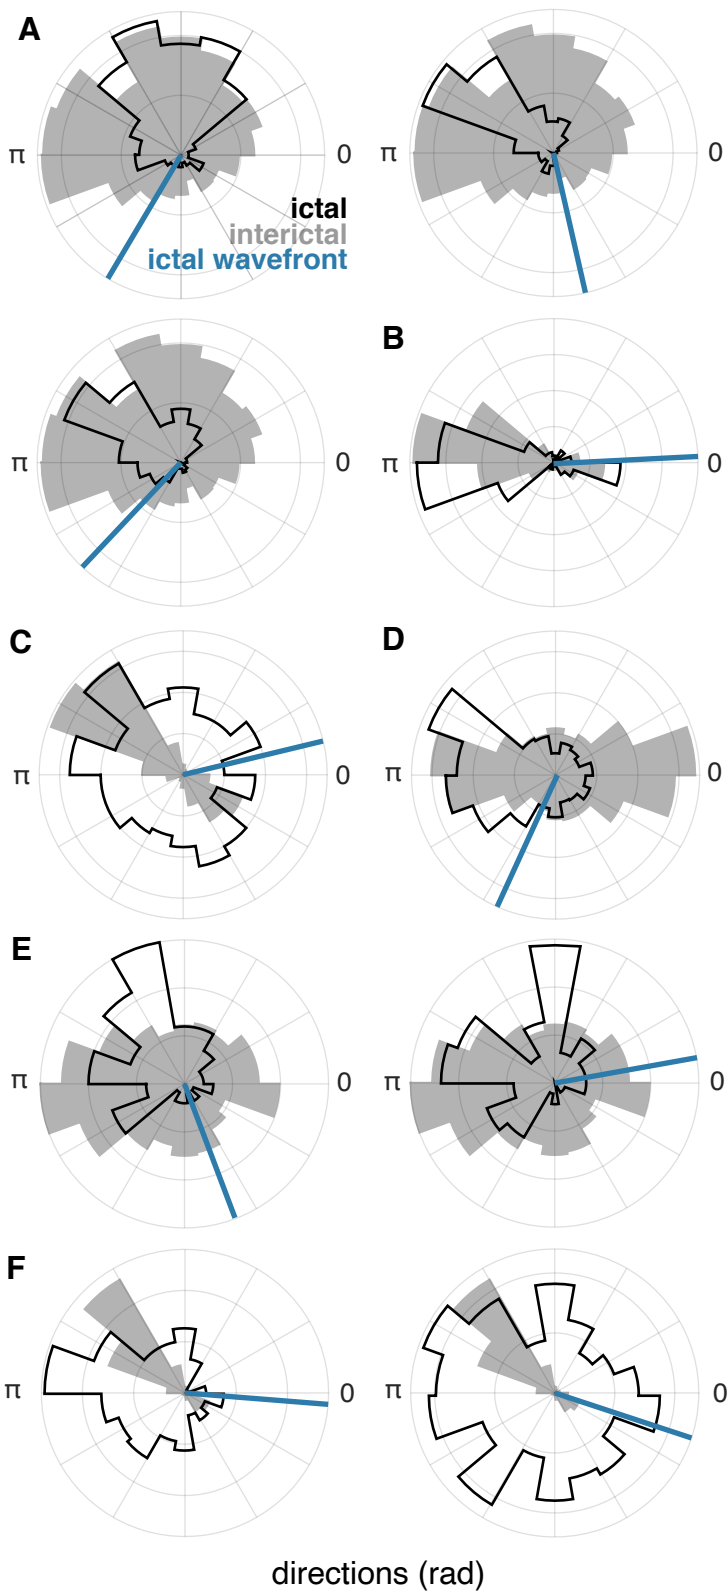

**G** IW, SD, and IED median directions

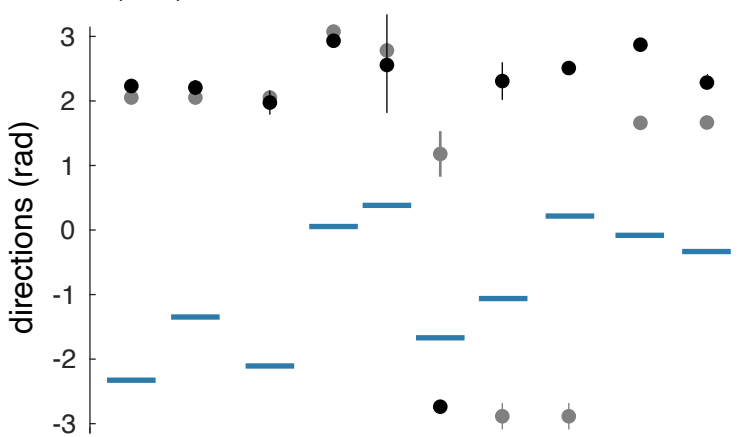

Supplement: supp [file elife-73541-supp-v1.zip]

**A**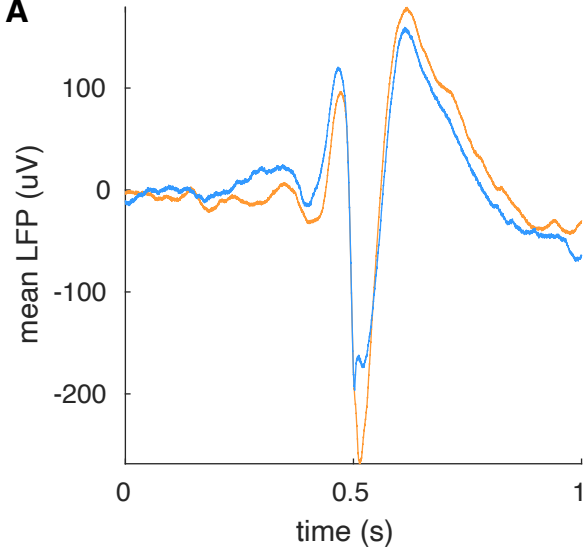**B**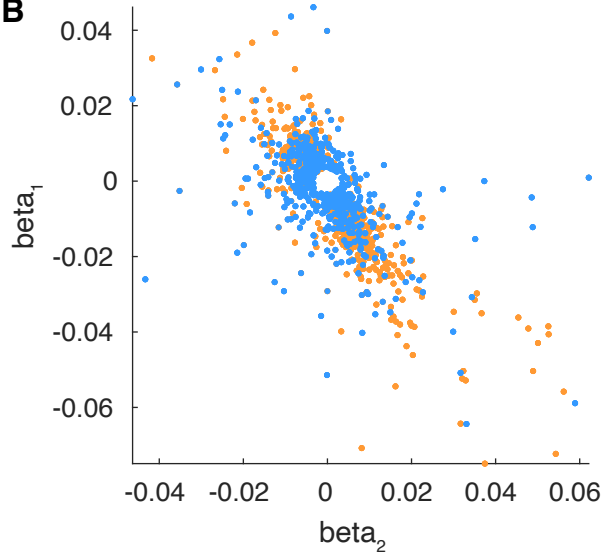

Supplement: supp [file elife-73541-supp-v1.zip]
